# Supplementary material
Source: Springer Nature journal article supplement (https://www.springermedizin.de/resource/supplementary/12968_2013_3355_MOESM4_ESM.pdf/9583484)

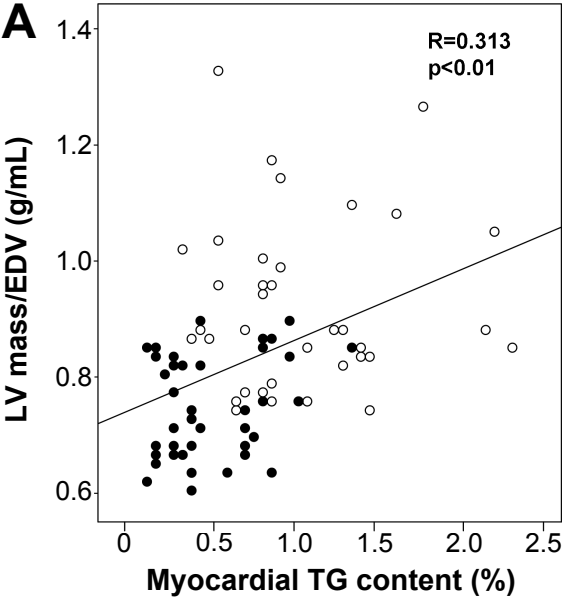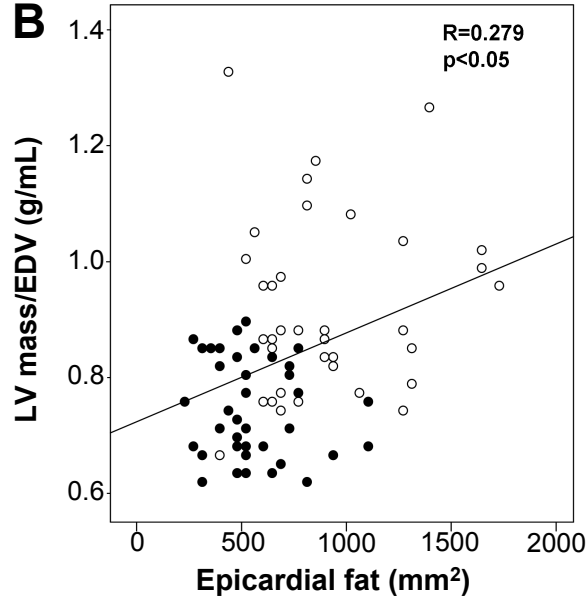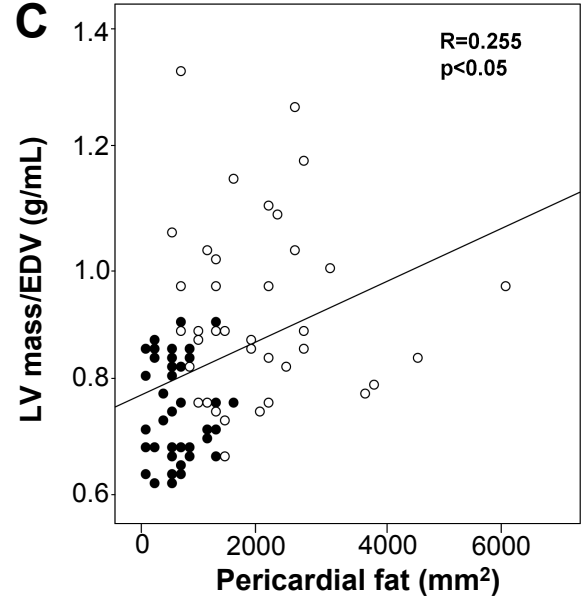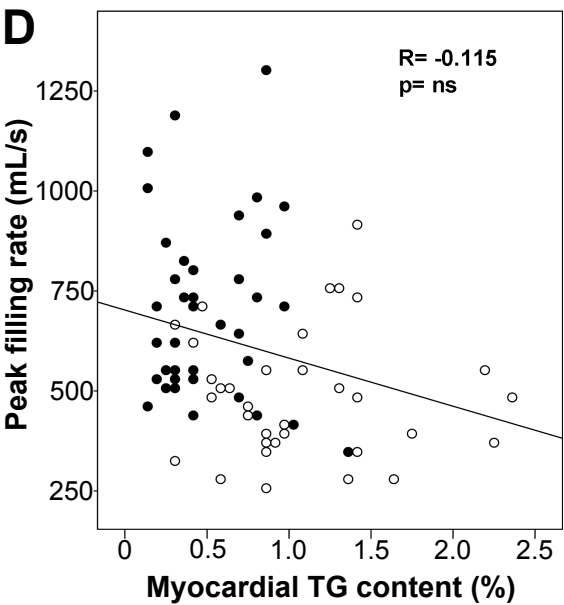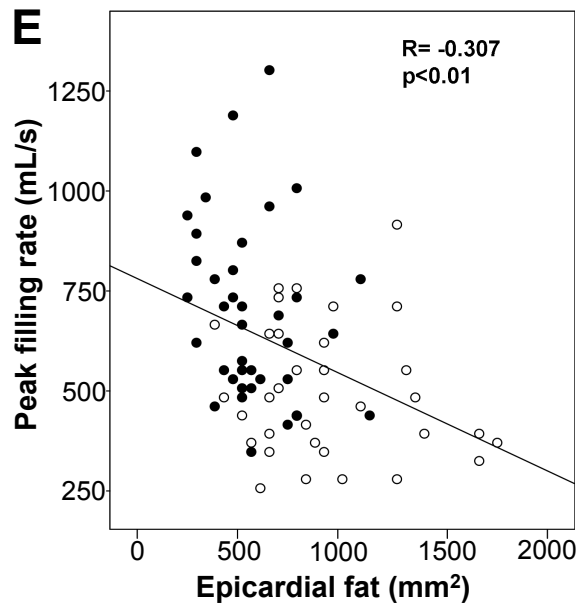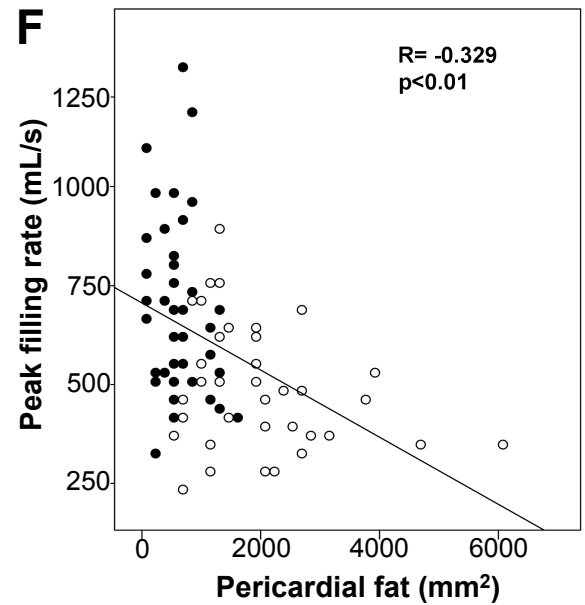

Supplement: MOESM4 [file 9583484]
